# Supplementary material for: Relationship between adverse events of adjuvant chemotherapy and survival outcomes: mediation analysis of Chinese colorectal cancer patients
Source: Research Square preprint supplement (doi:10.21203/rs.3.rs-120045/v1), 2020-12-23
Supplement: Supplementary file 1 [file 94b77ed594dbf99425560a7c.docx]

**Relationship between adverse events of adjuvant chemotherapy and survival outcomes: mediation analysis of Chinese colorectal cancer patients**

**Running head：adverse events in colorectal patients**

**Clinical study**

Author list: Chang Geng✟; Yuanren Tong✟; Na Zhou; Yingyi Wang*, M.D.

Author information:

Chang Geng and Yuanren Tong contributed equally to this work.

Affiliations

**Department of Oncology, Peking Union Medical College Hospital, Chinese Academy of Medical Sciences & Peking Union Medical College, Beijing, China, 100730**

Chang Geng, Yuanren Tong, Na Zhou, Yingyi Wang

Corresponding author:

Yingyi Wang, M.D.

E-mail: wyydaifu@163.com

Mobile: +86 15001334628

**Supplementary figure legends**

Supplementary Figure.1 Survival outcomes of all patients with different clinical parameters (age[≤65 and >65], gender, ECOG scores [=0 and ≥1], hepatitis, hypertension, diabetes, T stage [T=4 and T≤3], N stage [N≥1 and N =0], M stage [M=0 and M =1], cancer location [colon and rectum], left or right colon).

Supplementary Figure 2 Survival outcomes of young patients with different clinical parameters (gender, hepatitis, hypertension, diabetes, T stage [T=4 and T≤3], N stage [N≥1 and N =0], M stage [M=0 and M =1], cancer location [colon and rectum], left or right colon).

Supplementary Figure 2 Survival outcomes of old patients with different clinical parameters (gender, hepatitis, hypertension, diabetes, T stage [T=4 and T≤3], N stage [N≥1 and N =0], M stage [M=0 and M =1], cancer location [colon and rectum], left or right colon).
