# Supplementary material for: Relationship between adverse events of adjuvant chemotherapy and survival outcomes: mediation analysis of Chinese colorectal cancer patients
Source: Research Square preprint supplement (doi:10.21203/rs.3.rs-120045/v1), 2020-12-23
Supplement: Supplementary file 2 [file ee77a5c6c7eff8e740b26622.docx]

**Relationship between adverse events of adjuvant chemotherapy and survival outcomes: mediation analysis of Chinese colorectal cancer patients**

**Running head：adverse events in colorectal patients**

**Clinical study**

Author list: Chang Geng✟; Yuanren Tong✟; Na Zhou; Yingyi Wang*, M.D.

Author information:

Chang Geng and Yuanren Tong contributed equally to this work.

Affiliations

**Department of Oncology, Peking Union Medical College Hospital, Chinese Academy of Medical Sciences & Peking Union Medical College, Beijing, China, 100730**

Chang Geng, Yuanren Tong, Na Zhou, Yingyi Wang

Corresponding author:

Yingyi Wang, M.D.

E-mail: wyydaifu@163.com

Mobile: +86 15001334628

Supplementary Table 1 Adverse events in old patients with/without hepatitis

|  | **Hepatitis** | **No hepatitis** | ***p* value** |
| --- | --- | --- | --- |
| **N = 17** | **N = 34** |
| **Hematologic toxicity** |  |  |  |
| **I** | 0(0%) | 3(9%) | 0.843 |
| **II** | 2(12%) | 3(9%) |
| **III** | 0(0%) | 2(6%) |
| **IV** | 1(6%) | 2(6%) |
| **Digestive toxicity** |  |  |  |
| **Nausea** | 4(24%) | 9(26%) | 1 |
| **Vomit** | 3(18%) | 5(15%) | 1 |
| **Diarrhea** | 2(12%) | 8(24%) | 0.463 |
| **General toxicity** |  |  |  |
| **Numb** | 2(12%) | 8(24%) | 0.463 |
| **Fever** | 3(18%) | 8(24%) | 0.731 |

Supplementary Table 2 Adverse events in old patients with/without diabetes

|  | **Diabetes** | **No diabetes** | ***p* value** |
| --- | --- | --- | --- |
| **N = 7** | **N = 43** |
| **Hematologic toxicity** |  |  |  |
| **I** | 0(0%) | 3(6%) | 0.773 |
| **II** | 2(29%) | 3(6%) |
| **III** | 0(0%) | 2(5%) |
| **IV** | 0(0%) | 2(5%) |
| **Digestive toxicity** |  |  |  |
| **Nausea** | 3(43%) | 10(23%) | 0.357 |
| **Vomit** | 1(14%) | 7(16%) | 1 |
| **Diarrhea** | 2(29%) | 8(19%) | 0.616 |
| **General toxicity** |  |  |  |
| **Numb** | 0(0%) | 10(23%) | 0.319 |
| **Fever** | 2(29%) | 9(21%) | 0.641 |

Supplementary Table 3 Adverse events in young patients with/without hepatitis

|  | **Hepatitis** | **No hepatitis** | ***p* value** |
| --- | --- | --- | --- |
| **N = 18** | **N = 98** |  |
| **Hematologic toxicity** |  |  |  |
| **I** | 0(0%) | 7(7%) | 0.259 |
| **II** | 3(17%) | 8(8%) |
| **III** | 1(6%) | 9(9%) |
| **IV** | 1(17%) | 1(1%) |
| **Digestive toxicity** |  |  |  |
| **Sick** | 6(33%) | 33(34%) | 1 |
| **Vomit** | 4(22%) | 32(33%) | 0.583 |
| **Diarrhea** | 2(11%) | 21(21%) | 0.524 |
| **General toxicity** |  |  |  |
| **Numb** | 2(11%) | 15(15%) | 1 |
| **Fever** | 3(17%) | 16(16%) | 1 |

Supplementary Table 4 Basic characteristics of patients included in different age groups and ECOG groups

| **Characteristics** | ECOG | ECOG missing | *p* value |
| --- | --- | --- | --- |
| N = 155 | N = 253 |  |
| **Sex, male/female** | 89/66 | 150/103 | 0.788 |
| **Age, mean±SE** | 59.50±10.53 | 58.86±11.31 | 0.578 |
| **Location of tumor** |  |  |  |
| **Colon** | 83 | 122 | 0.346 |
| Right colon | 39 | 58 | 0.999 |
| Left colon | 44 | 64 |  |
| **Rectum** | 72 | 131 |  |
| **Differentiation level** |  |  | 0.801 |
| **Low** | 4 | 6 |  |
| **Medium** | 83 | 145 |  |
| **High** | 24 | 41 |  |
| **x** | 44 | 61 |  |
| **T stage** |  |  | 0.317 |
| **1** | 1 | 8 |  |
| **2** | 7 | 20 |  |
| **3** | 79 | 124 |  |
| **4** | 43 | 63 |  |
| **x** | 25 | 38 |  |
| **N stage** |  |  | **0.008** |
| **0** | 19 | 43 |  |
| **1** | 56 | 120 |  |
| **2** | 49 | 46 |  |
| **3** | 0 | 2 |  |
| **x** | 31 | 39 |  |
| **M stage** |  |  | **0.001** |
| **0** | 62 | 137 |  |
| **1** | 62 | 55 |  |
| **x** | 31 | 61 |  |
| **Comorbidities** |  |  |  |
| **Hypertension** | 43/155 | 13/60 | 0.461 |
| **Diabetes** | 21/155 | 6/60 | 0.635 |
| **Hepatitis** | 24/155 | 11/60 | 0.411 |
| **OS (median)** | 735 | 540 | 0.305 |
| **DFS (median)** | 450 | 510 | 0.809 |
